# Supplementary material for: Upgrading of palmitic acid over MOF catalysts in supercritical fluid of n-hexane
Source: Royal Society of Chemistry journal article supplement (doi:10.1039/c7ra07239b), 2017-01-01
Supplement: c7ra07239b1.pdf [file c7ra07239b1.pdf]

## Supporting Information

### Upgrading of palmitic acid over MOF catalysts in supercritical fluid of n-hexane

Xiao Fang<sup>a</sup>, Yanchun Shi<sup>a</sup>, Kejing Wu<sup>a</sup>, Junmei Liang<sup>a</sup>, Yulong Wu<sup>a,b\*</sup>, Mingde Yang<sup>a</sup>

a: Institute of Nuclear and New Energy Technology, Tsinghua University, Beijing  
100084, PR China

b: Beijing Engineering Research Center for Biofuels, Beijing 100084, China

\*Corresponding author: Prof. Dr. Yulong Wu

Address: Institute of Nuclear and New Energy Technology, Tsinghua University,  
Beijing 100084, PR China

Tel: +86 010-89796163; Fax: +86 10-69771464

E-mail: [wylong@tsinghua.edu.cn](mailto:wylong@tsinghua.edu.cn) (Y. L. Wu)

### **MOF-5 hollow nanospheres**

In a typical procedure,  $\text{Zn}(\text{NO}_3)_2 \cdot 6\text{H}_2\text{O}$  11.6 mg,  $\text{H}_2\text{BDC}$  2.4 mg, and PVP ( $M_w = 30000$ , 150 mg) were dissolved in DMF-ethanol mixture (6.4 mL, v/v = 5:3) under magnetic stirring for 10 minutes at room temperature. The resulting homogeneous solution was transferred to a 12 mL Teflon-lined stainless-steel autoclave. The sealed vessel was then heated at 150 °C for 12 h before it was cooled to room temperature. The products were separated via centrifugation at 11000 rpm for 15 minutes and further purified with DMF and ethanol for several times. [1]

### **PTA@MOF-5 hollow nanospheres**

11.6 mg  $\text{Zn}(\text{NO}_3)_2 \cdot \text{H}_2\text{O}$ , 2.4 mg  $\text{H}_2\text{BDC}$ , 150 mg PVP and 2.4 mg PTA were dissolved in 6.4 mL DMF-ethanol mixture (v/v = 5:3) under magnetic stirring for 10 minutes at room temperature. The resulting homogeneous solution was transferred to a 12 mL Teflon-lined stainless-steel autoclave. After heating the sealed vessel at 150 °C for 12 h it was cooled to room temperature. The products were separated via centrifugation at 11000 rpm for 15 min and further purified with DMF and ethanol for several times.

### **Preparation of $\text{Fe}^{\text{III}}$ -MOF-5 hollow octahedral nanostructures.**

In a typical procedure,  $\text{Fe}(\text{acac})_3$ , 60 mg,  $\text{Zn}(\text{NO}_3)_2 \cdot 6\text{H}_2\text{O}$  46.4 mg,  $\text{H}_2\text{BDC}$  9.6 mg, and PVP ( $M_w = 30000$ , 200 mg) were dissolved in DMF-ethanol mixture (25.6 mL, v/v = 5:3) under magnetic stirring for 10 minutes at room temperature. The resulting

homogeneous solution was transferred to a 40 mL Teflon-lined stainless-steel autoclave. The sealed vessel was then heated at 100 °C for 6 h before it was cooled to room temperature. The products were separated via centrifugation at 11000 rpm for 15 min and further purified with DMF and ethanol for several times. [1]

### **Synthesis of PdCu dendrites.**

In a typical synthesis, PdCu dendrites were synthesized according to the previous report [1]. Briefly, Pd(acac)<sub>2</sub> (7.6 mg), Cu(acac)<sub>2</sub> (6.5 mg), and PVP (M<sub>w</sub> = 30000, 50 mg) were dissolved in DMF (4 mL) with stirred for 10 min at room temperature and heated to 150 °C for 4 h in a 12 mL Teflon-lined stainless-steel autoclave. The resulting products were separated via centrifugation at 11000 rpm for 15 minutes and further purified with ethanol for several times.

### **Synthesis of Pd NPs.**

Pd NPs were synthesized using the same procedure as PdCu alloy NPs but without the addition of Cu(acac)<sub>2</sub> in the reaction solution. [1]

### **Synthesis of Au NPs.**

Briefly, PVP (M<sub>w</sub> = 30000, 50 mg), and H<sub>2</sub>C<sub>2</sub>O<sub>4</sub> (0.5 mmol, 63 mg) were dissolved in formamide (5 mL) and heated to 120 °C, and HAuCl<sub>4</sub>·4H<sub>2</sub>O aqueous solution (0.25mL, 0.2 M) was injected and the solution was maintained at 120 °C for 10 min. The products were separated via centrifugation at 10000 rpm for 5 minutes and

further purified with ethanol for several times. [2]

### **General nanoparticle encapsulation procedure.**

For all nanoparticles ethanol was used as solvent. Typically, a 2 mL nanoparticles solution of desired concentration and PVP ( $M_w = 30000$ , 200 mg) were mixed with DMF-ethanol mixture (23.6 mL, v/v =5:3) under magnetic stirring for 10 min at room temperature. Then,  $\text{Fe}(\text{acac})_3$  60mg,  $\text{Zn}(\text{NO}_3)_2 \cdot 6\text{H}_2\text{O}$  46.4 mg,  $\text{H}_2\text{BDC}$  9.6 mg were added to the above solution under magnetic stirring for another 10 minutes. The resulting solution was transferred to a 40 mL Teflon-lined stainless-steel autoclave. The sealed vessel was then heated at 100 °C for 6 h before it was cooled to room temperature. The products were separated via centrifugation at 11000 rpm for 15 minutes and further purified with DMF and ethanol for several times. [1]

### **Characterization**

Powder X-ray diffraction (PXRD) patterns of the samples were recorded on a Bruker D8-advance X-ray powder diffractometer operated at 40 kV voltage and 40 mA current with  $\text{CuK}\alpha$  radiation ( $\lambda=1.5406 \text{ \AA}$ ). Transmission electron microscopy (TEM) was performed on a JEM 2100 LaB6 TEM (JEOL). X-ray photoelectron spectroscopy (XPS) was performed on scanning X-ray microprobe (Quantera SXM, ULVAC-PHI. INC) operated at 250 kV, 55 eV with monochromated  $\text{Al K}\alpha$  radiation. Binding energies were corrected by reference to the C 1s peak at 284.8 eV. Fourier-transformed infrared resonance (FT-IR) spectra were obtained in transmission

mode on a Perkin-Elmer Spectrum 100 spectrometer (Waltham, MA, USA). Thermogravimetric (TG) analysis was carried out at a constant heating rate of 10 °C min<sup>-1</sup> from room temperature to 700 °C in N<sub>2</sub> atmosphere, using a TA-50 thermal analyzer. Elemental analysis of Pd, Cu and W in the solid samples was determined by inductively coupled plasma atomic emission spectrometry (ICP-AES, IRIS Intrepid II XSP, ThermoFisher). The surface area was calculated by the Brunauer-Emmett-Teller (BET) method, and the pore size distribution was calculated by the Barrett - Joyner - Halenda (BJH) method.

**Figure captions:**

**Fig. S1** TEM image of MOF-5.

**Fig. S2** TEM image of PTA@MOF-5.

**Fig. S3** TEM image of FeIII-MOF-5.

**Fig. S4** TEM image of PdCu@FeIII-MOF-5.

**Fig. S5** TEM image of Pd NPs@FeIII-MOF-5.

**Fig. S6** TEM image of Au NPs@FeIII-MOF-5.

**Fig. S7** TEM image of PdCu dendrites.

**Fig. S8** TEM image of Pd NPs.

**Fig. S9** TEM image of Au NPs.

**Fig. S10** XRD analysis of FeIII-MOF-5.

**Fig. S11** XPS spectra of PTA@FeIII-MOF-5 hollow octahedral nanostructures: (a)

The survey spectrum; (b) XPS Fe 2p spectrum; (c) XPS Zn 2p spectrum.

**Fig. S12** XRD analysis of Au NPs.

**Table S1** Catalytic HDO of palmitic acid in traditional meida.

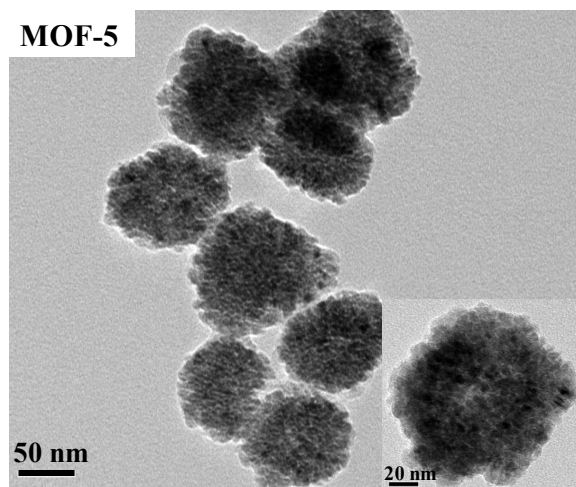

Fig. S1 TEM image of MOF-5.

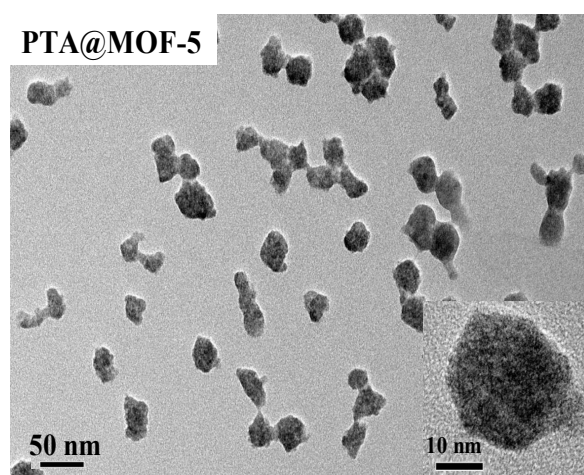

Fig. S2 TEM image of PTA@MOF-5.

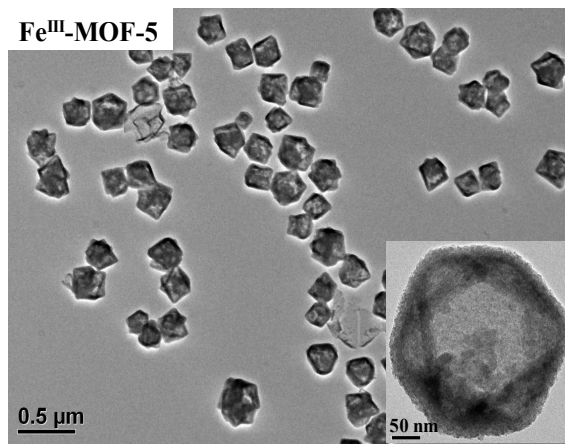

Fig. S3 TEM image of Fe<sup>III</sup>-MOF-5.

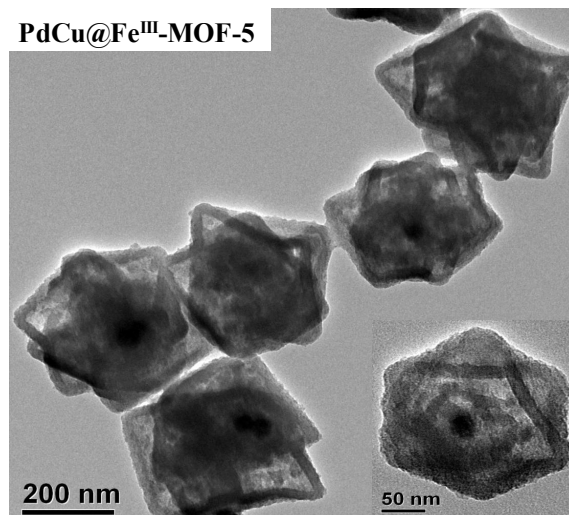

Fig. S4 TEM image of PdCu@Fe<sup>III</sup>-MOF-5.

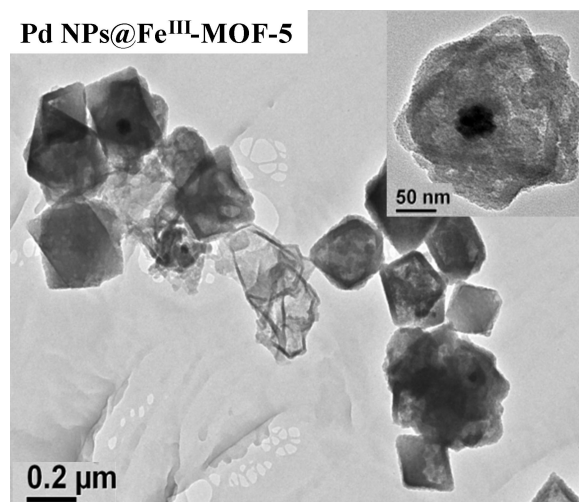



Fig. S5 TEM image of Pd NPs@Fe<sup>III</sup>-MOF-5.

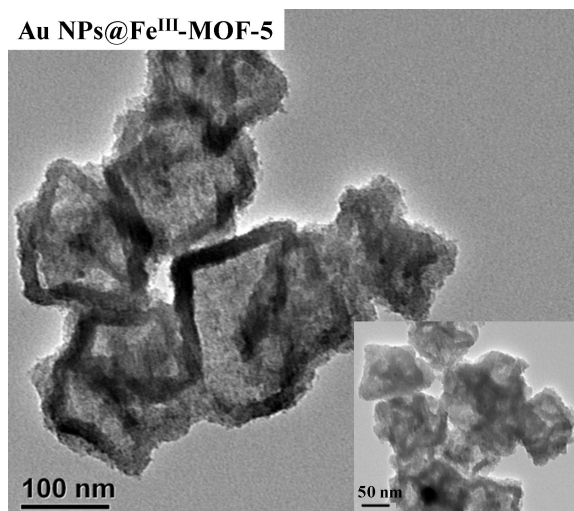

Fig. S6 TEM image of Au NPs@Fe<sup>III</sup>-MOF-5.

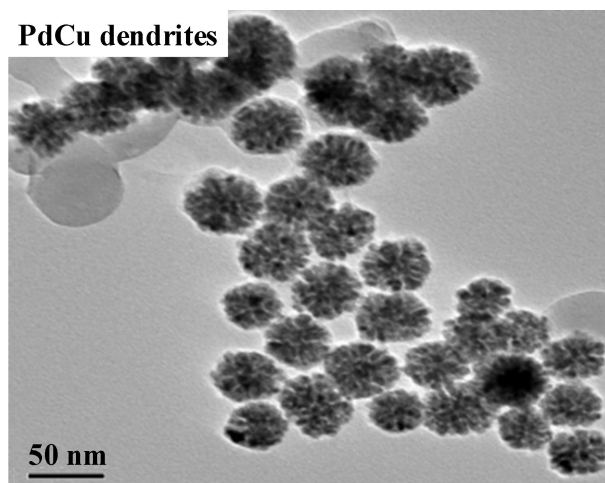

Fig. S7 TEM image of PdCu dendrites.

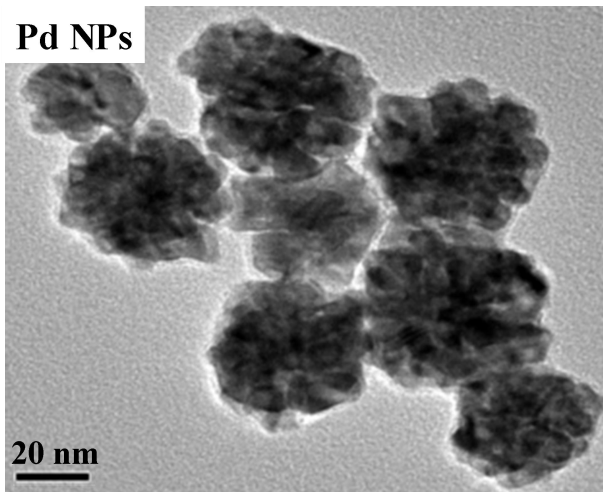

Fig. S8 TEM image of Pd NPs.

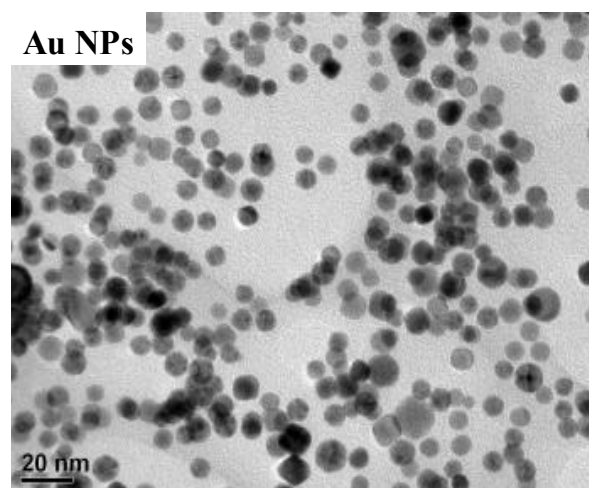

Fig. S9 TEM image of Au NPs.

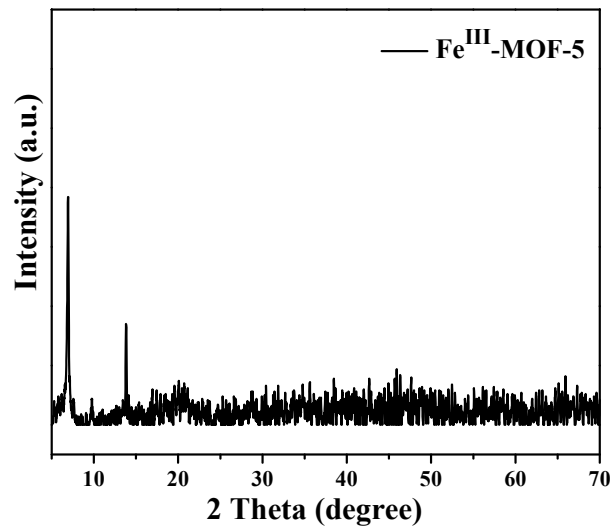

Fig. S10 XRD analysis of Fe<sup>III</sup>-MOF-5.

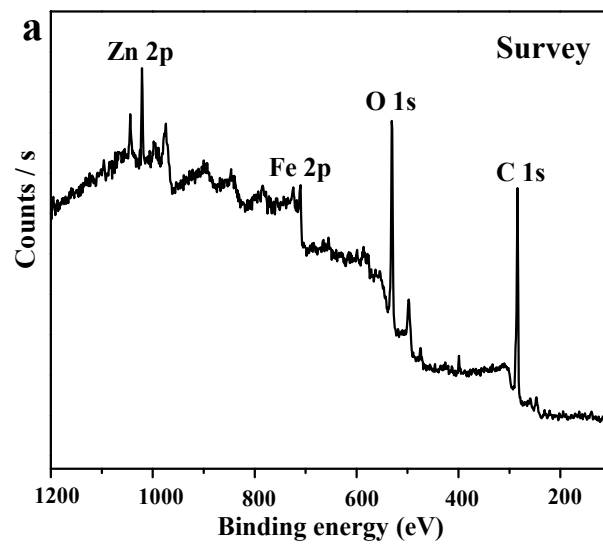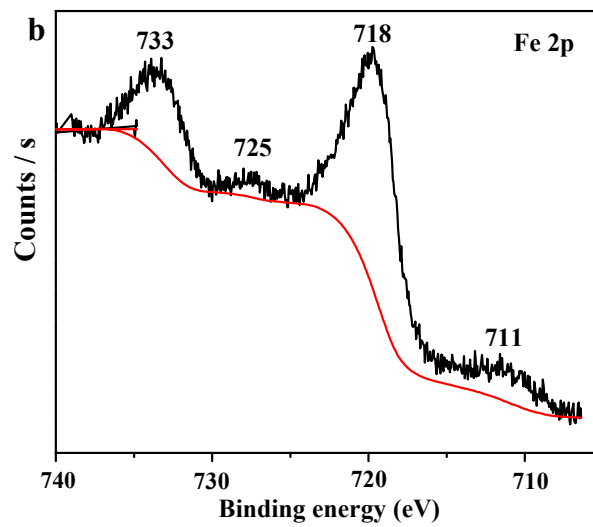

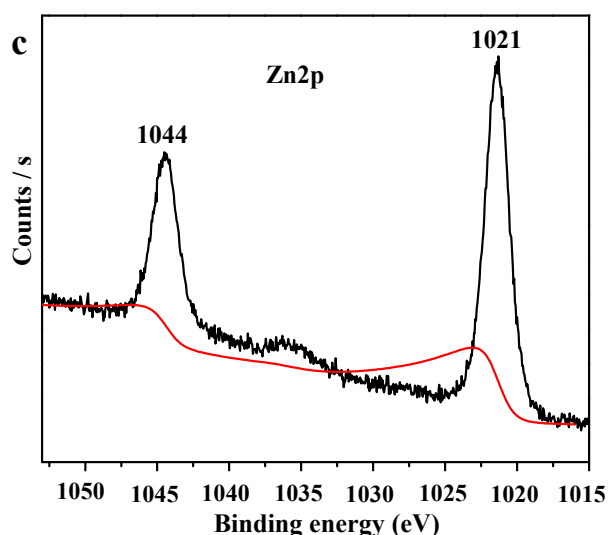

Fig. S11. XPS spectra of PTA@Fe<sup>III</sup>-MOF-5 hollow octahedral nanostructures: (a)

The survey spectrum; (b) XPS Fe 2p spectrum; (c) XPS Zn 2p spectrum.

As shown in Figure S11b, the Fe 2p peaks of Fe<sup>III</sup>-MOF-5 hollow spheres at ~711 eV and ~725 eV are assigned to Fe 2p<sub>3/2</sub> and Fe 2p<sub>1/2</sub> for iron (III) oxide, and the additional satellite peaks at ~718 eV and ~733 eV are associated with Fe 2p<sub>3/2</sub> and Fe 2p<sub>1/2</sub>, which exhibits similar spectra with those of Fe<sub>2</sub>O<sub>3</sub>. [3] The Zn 2p peaks at ~1021eV and ~1044 eV are assigned to Zn 2p<sub>3/2</sub> and Zn 2p<sub>1/2</sub> for zinc (II) oxide. [4]

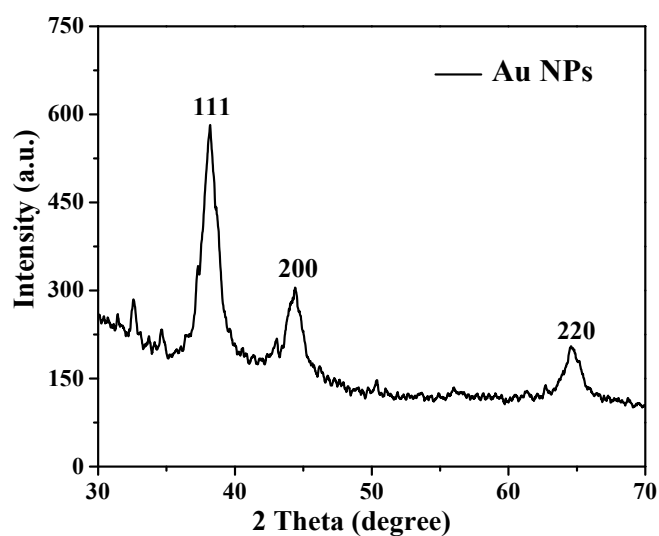

Fig. S12. XRD analysis of Au NPs.

As shown in Fig. S12, the XRD analysis of the as-synthesized Au NPs coincides

with the literatures [1, 2].

Table S1 Catalytic HDO of palmitic acid in traditional meida.

| Catalyst                                   | T /<br>°C | t /<br>h | P <sub>H2</sub> /<br>MPa | Conv.<br>/ % | Product distribution / %    |                                     |                                     |                             |
|--------------------------------------------|-----------|----------|--------------------------|--------------|-----------------------------|-------------------------------------|-------------------------------------|-----------------------------|
| 5 % MoO <sub>2</sub> /CNTs [5]             | 220       | 4        | 4                        | 100          | Pentadecane / 7.60          |                                     | Hexadecane / 92.20                  |                             |
| 1.5 % Co-5 %<br>MoO <sub>2</sub> /CNTs [6] | 180       | 4        | 4                        | 100          | Pentadecane / 5.20          |                                     | Hexadecane / 89.30                  |                             |
| 5 % Ni/CNTs [7]                            | 240       | 4        | 2                        | 97.25        | Pentadecane / 89.64         |                                     |                                     |                             |
| Mo/HZ-R [8]                                | 260       | 4        | 4                        | 100          | n-C <sub>15</sub> /<br>23.6 | multi-iso-C <sub>16</sub><br>/ 15.6 | mono- iso-C <sub>16</sub><br>/ 44.1 | n-C <sub>16</sub><br>/ 15.8 |

## References

- 1 Z. Zhang, Y. Chen, X. Xu, J. Zhang, G. Xiang, W. He and X. Wang, *Angew. Chem. Int. Ed.*, 2014, **53**, 429-433.
- 2 B. Xu, Z. Zhang and X. Wang, *Nanoscale*, 2013, **5**, 4495-4505.
- 3 Y. Yang, H. X. Ma, J. Zhuang and X. Wang, *Inorg. Chem.* 2011, 50, 10141-10151.
- 4 L. Wang, D. Zhao, S.-L. Zhong and A.-W. Xu, *CrystEngComm*, 2012, **14**, 6875-6880.
- 5 R. Ding, Y. Wu, Y. Chen, J. Liang, J. Liu and M. Yang, *Chem. Eng. Sci.*, 2015, **135**, 517-525.
- 6 R. Ding, Y. Wu, Y. Chen, H. Chen, J. Wang, Y. Shi and M. Yang, *Catal. Sci. Technol.*, 2016, **6**, 2065-2076.
- 7 Y. Duan, R. Ding, Y. Shi, X. Fang, H. Hu, M. Yang and Y. Wu, *Catal.*, 2017, **7**, 8
- 8 Y. Shi, Y. Cao, Y. Duan, H. Chen, Y. Chen, M. Yang and Y. Wu, *Green Chem.*, 2016, **18**, 4633-4648.
